# Supplementary material for: Magnetoelectric synergy strategy for superior iron disulfide anode
Source: Royal Society of Chemistry journal article supplement (doi:10.1039/d2qi02441a), 2023-01-01
Supplement: d2qi02441a1.pdf [file d2qi02441a1.pdf]

## Supporting Information

### Magnetoelectric Synergy Strategy for Superior Iron Disulfide Anode

Yaoyao Xiao<sup>a,b</sup>, Yihui Liu<sup>a,b</sup>, Bingbing Liu<sup>a,b</sup>, Zhenguo Qi<sup>a,b</sup>, Youbin Zhang<sup>a,b</sup>, Fusheng Liu<sup>a,b\*</sup> and

Guohui Qin<sup>a,b\*</sup>

<sup>a</sup> *State Key Laboratory Base for Eco-Chemical Engineering, College of Chemical Engineering,*

*Qingdao University of Science and Technology, Qingdao 266042, Shandong, China*

<sup>b</sup> *Shandong Synergetic Innovation Center of Ecological and Chemical Engineering, Qingdao 266042,*

*China*

Corresponding author.

E-mail

address:guohuiq163@sina.com

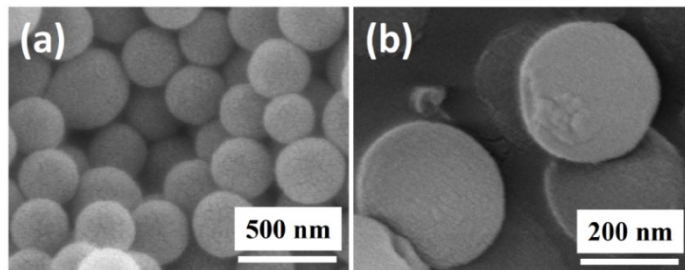

Fig. S1. SEM images of Fe<sub>3</sub>O<sub>4</sub>/C sample.

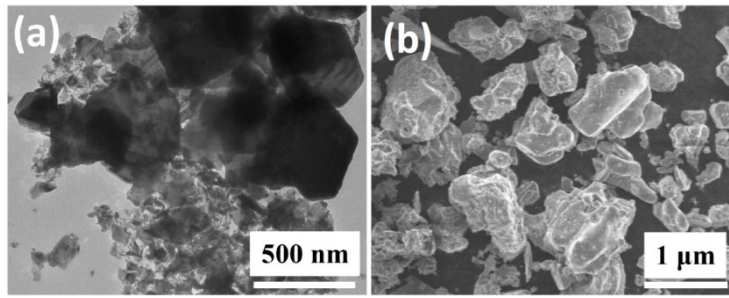

**Fig. S2.** (a) TEM and (b) SEM images of FeS<sub>2</sub> sample.

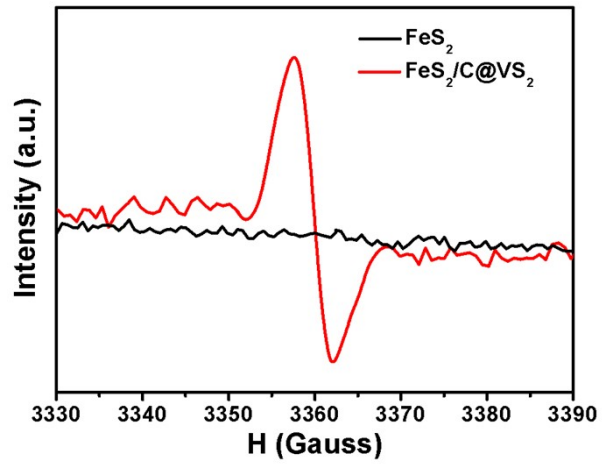

Fig. S3. EPR image of  $\text{FeS}_2$  and  $\text{FeS}_2/\text{C}@/\text{VS}_2$  samples.

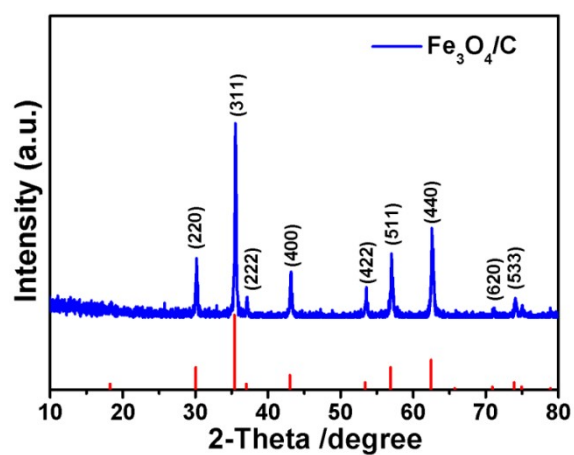

Fig. S4. XRD pattern spectra of Fe<sub>3</sub>O<sub>4</sub>/C sample.

The sharp crystalline peaks at  $2\theta$  of  $30.1^\circ$ ,  $35.5^\circ$ ,  $37.0^\circ$ ,  $43.3^\circ$ ,  $53.3^\circ$ ,  $57.3^\circ$  and  $62.9^\circ$  can be well attributed to (220), (311), (222), (400), (422), (511) and (440) planes of Fe<sub>3</sub>O<sub>4</sub> (PDF# 19-0629).<sup>1</sup>

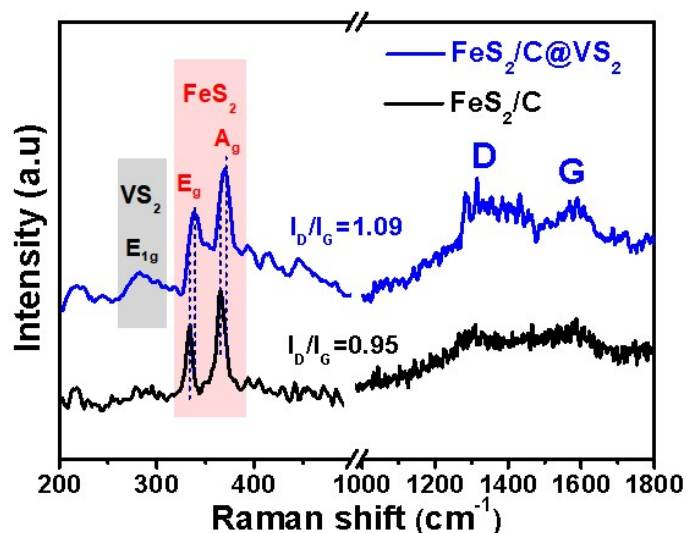

Fig. S5. Raman spectra of  $\text{FeS}_2/\text{C}@\text{VS}_2$  and  $\text{FeS}_2/\text{C}$  samples.

In the raman spectra of  $\text{FeS}_2/\text{C}@\text{VS}_2$ , two peaks located at 1314 and 1589  $\text{cm}^{-1}$  can be observed corresponding to the D and G peaks of the carbon. The characteristic peaks located at 337.79 and 370.13  $\text{cm}^{-1}$  corresponded to the  $E_g$  vibration mode of S atoms and the  $A_g$  vibration mode of S-S phase stretching in  $\text{FeS}_2$ . The characteristic peak located at 283.61  $\text{cm}^{-1}$  corresponded to  $E_{1g}$  vibration mode of  $\text{VS}_2$ . Compared with  $\text{FeS}_2/\text{C}$ , the higher  $I_D:I_G$  value of  $\text{FeS}_2/\text{C}@\text{VS}_2$  implied its affluent defective active sites after the coupling of  $\text{VS}_2$ .

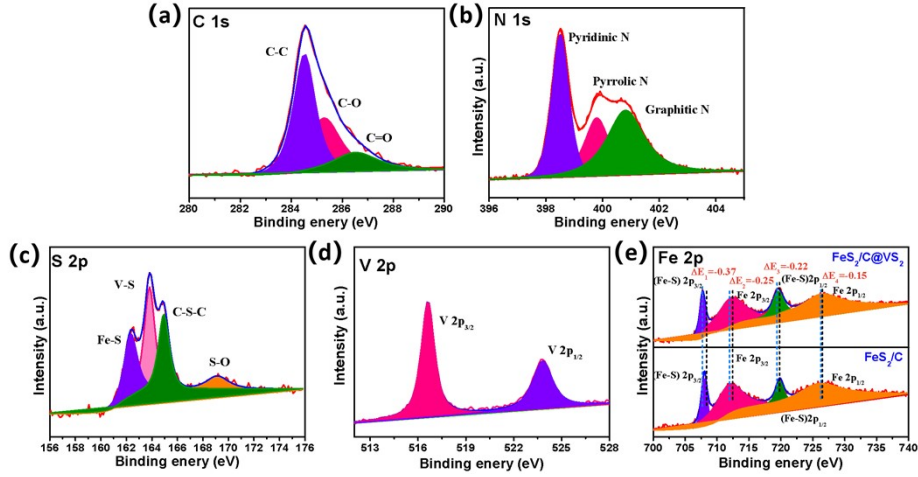

**Fig. S6.** XPS survey spectrum of  $\text{FeS}_2/\text{C}@\text{VS}_2$  sample, the high-resolution spectrum of (a) C 1s, (b) N 1s, (c) S 2p and (d) V 2p. Comparison of (e) Fe 2p spectrum with  $\text{FeS}_2/\text{C}$  and  $\text{FeS}_2/\text{C}@\text{VS}_2$  samples.

The C 1s spectra exhibited three peaks located at 284.53, 285.33 and 286.55 eV corresponding to the binding energies of C-C, C-O and C=O, respectively. The peaks of pyridinic N, pyrrolic N and graphitic N were plotted at 398.51 eV, 399.79 eV and 400.75 eV, respectively. The peaks located at 162.35 eV and 163.82 eV was originated from the  $\text{FeS}_2@\text{VS}_2$  heterojunction, while the C-S-C peak located at 164.92 eV further demonstrated the tight bonding of the carbon with the sulfide. The last peak located at 169.21 eV was assigned to S-O. The V peaks at 516.6 and 523.7 eV are ascribed to V  $2p_{3/2}$  and V  $2p_{1/2}$ , corresponding to the  $\text{V}^{4+}$  oxidation state.

The peak of (Fe-S)  $2p_{3/2}$ , Fe  $2p_{3/2}$ , (Fe-S)  $2p_{1/2}$  and Fe  $2p_{1/2}$  in the  $\text{FeS}_2/\text{C}$  shifted from the high-energy region (708.06, 712.44, 719.80 and 726.49 eV) to the low-energy region (707.69, 712.19, 719.58 and 726.34 eV) in  $\text{FeS}_2/\text{C}@\text{VS}_2$  ( $\Delta E_1=-0.37$  eV,  $\Delta E_2=-0.25$  eV,  $\Delta E_3=-0.22$  eV,  $\Delta E_4=-0.15$  eV). The shift of the binding energy in the intimate heterojunction material confirmed that the electrons can be transferred from  $\text{VS}_2$  to  $\text{FeS}_2$  arisen from the build-in electronic-field between  $\text{FeS}_2/\text{C}$  and  $\text{VS}_2$ .<sup>3</sup>

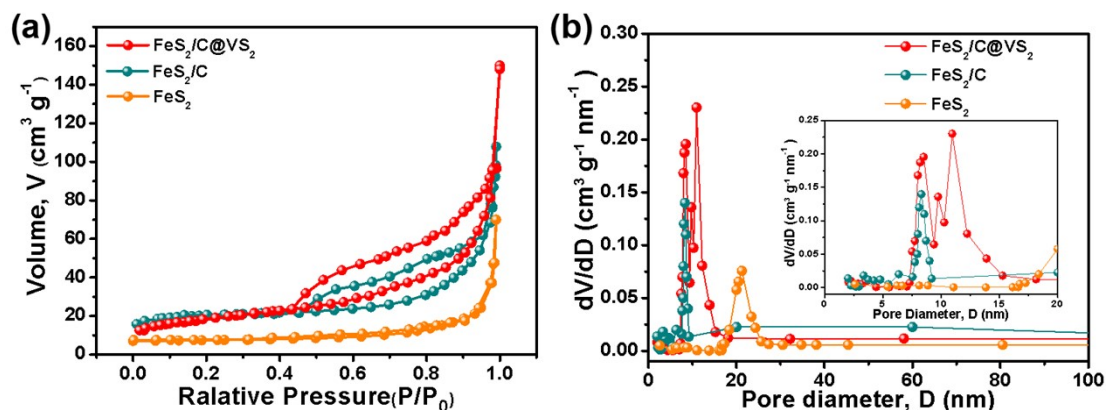

**Fig. S7.** (a) Nitrogen adsorption-desorption isotherms and (b) pore size distribution profiles of the FeS<sub>2</sub>, FeS<sub>2</sub>/C and FeS<sub>2</sub>/C@VS<sub>2</sub> samples.

The specific surface area and pore size distribution of the sample can be further investigated accurately by N<sub>2</sub> adsorption-desorption analysis. From the isothermal curves, it can be obtained that the FeS<sub>2</sub>/C@VS<sub>2</sub> had larger adsorbance than that of FeS<sub>2</sub> and FeS<sub>2</sub>/C, indicating that the FeS<sub>2</sub> multi-particle and VS<sub>2</sub> nanoflowers provided a high specific surface area of 102.8 m<sup>2</sup> g<sup>-1</sup>, and there were hysteresis loops in both curves, which were consistent with the type isothermal IV-curve. Therefore, it was a typical mesoporous structure. The hysteresis loops were closely related to the form of pores, and the hysteresis loop of FeS<sub>2</sub>/C@VS<sub>2</sub> was HI type, indicating that it was cumulate pores composed of nanoparticles, which was consistent with the results of TEM images. Also, its pore size was about 7-15 nm, this structure can promote the electrolyte ion transport during the electrochemical process and thus improved the rate performance of the battery.



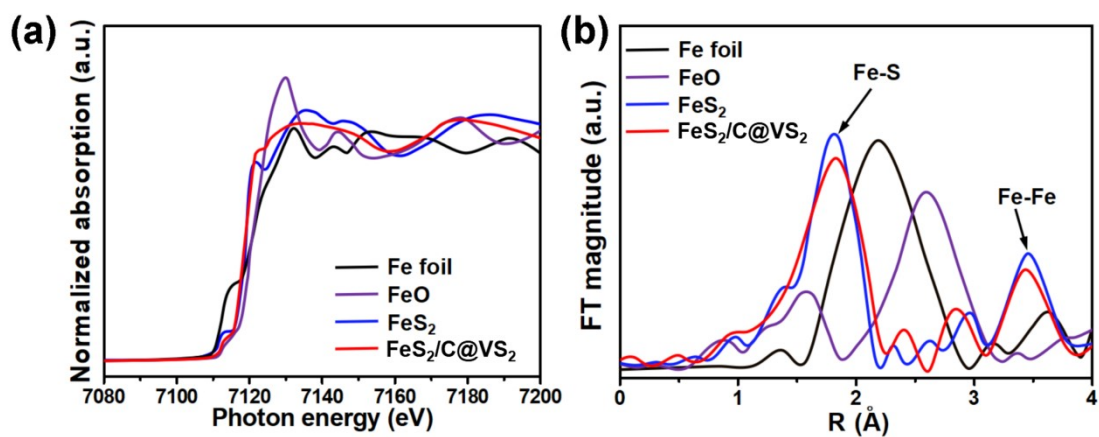

**Fig. S8.** (a) Comparison of Fe K-edge XANES spectra and (b) Fourier transform of the EXAFS spectra of Fe foil, FeO, FeS<sub>2</sub> and FeS<sub>2</sub>/C@VS<sub>2</sub> samples.

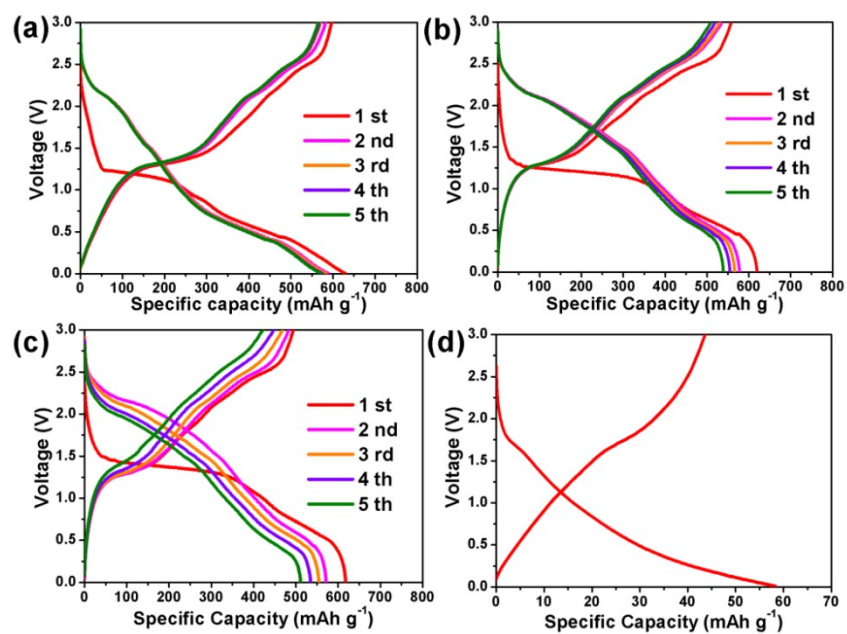

**Fig. S9.** Galvanostatic discharge/charge curves of (a)  $\text{FeS}_2/\text{C}@\text{VS}_2$ , (b)  $\text{FeS}_2/\text{C}$ , (c)  $\text{FeS}_2$  and (d)  $\text{VS}_2$  in the initial loops.

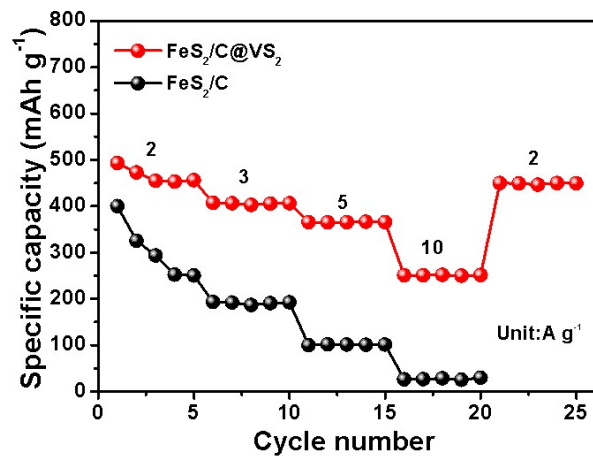

**Fig. S10.** Rate capability of FeS<sub>2</sub>/C and FeS<sub>2</sub>/C@VS<sub>2</sub> electrodes at high current densities.

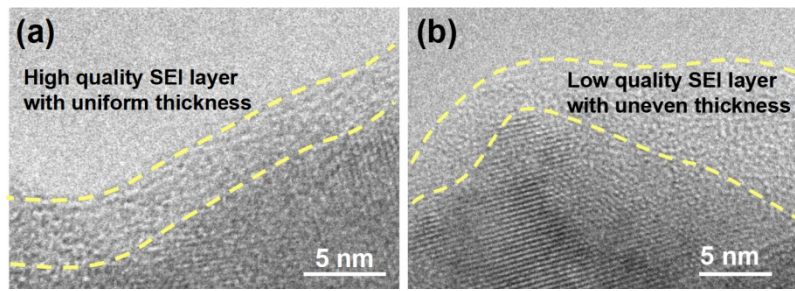

**Fig. S11.** TEM images of (a)  $\text{FeS}_2/\text{C}@\text{VS}_2$  and (b)  $\text{FeS}_2/\text{C}$  electrodes after cycles.

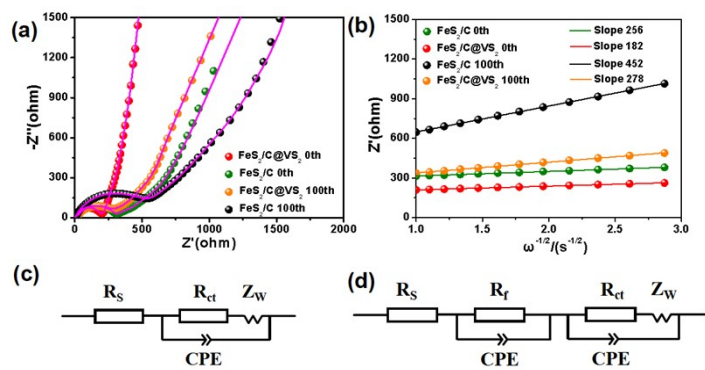

**Fig. S12.** (a) EIS plots of FeS<sub>2</sub>/C and FeS<sub>2</sub>/C@VS<sub>2</sub> electrodes before and after 100 cycles, (b) corresponding linear fits of the  $Z'$  versus  $\omega^{-1/2}$  in the low-frequency region. The corresponding equivalent circuit model (c) before and (d) after 100 cycles.

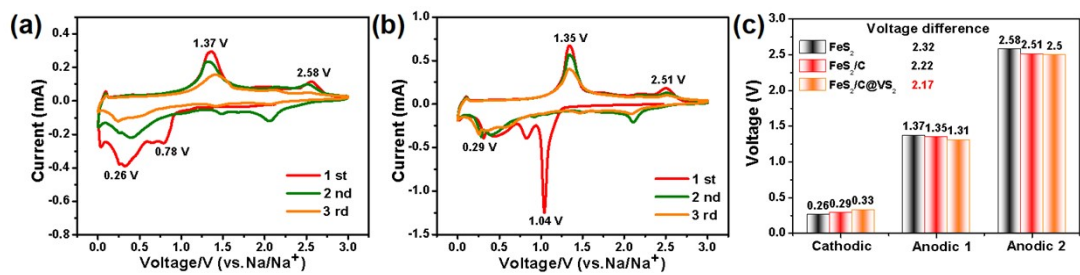

**Fig. S13.** Cyclic voltammograms of (a) FeS<sub>2</sub> and (b) FeS<sub>2</sub>/C electrodes, (c) comparison of peak voltages of FeS<sub>2</sub>-based electrodes.

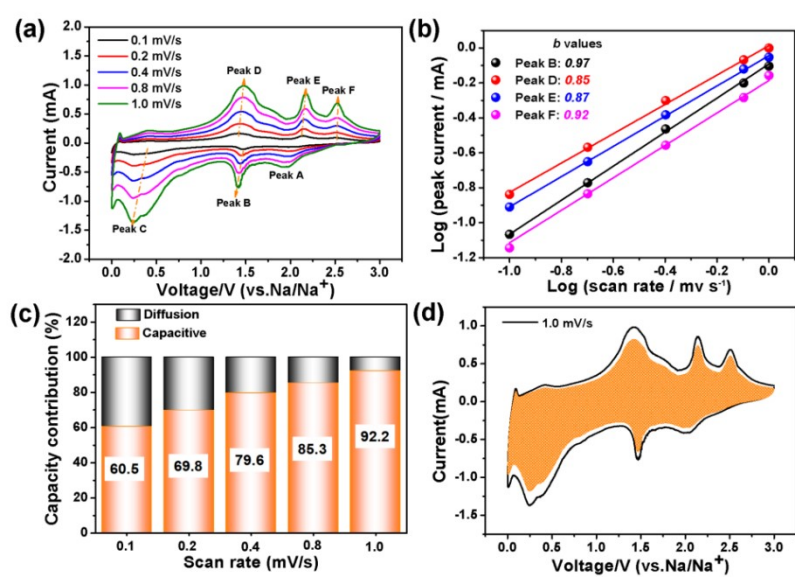

**Fig. S14.** (a) CV curves at various scan rates from 0.1 to 1.0 mV s<sup>-1</sup>, (b) the plots of log(i) vs. log(v), (c) the ratios of capacitive contribution at various rates, (d) CV curves with capacitive contribution at 1.0 mV s<sup>-1</sup> of FeS<sub>2</sub>/C@VS<sub>2</sub>.

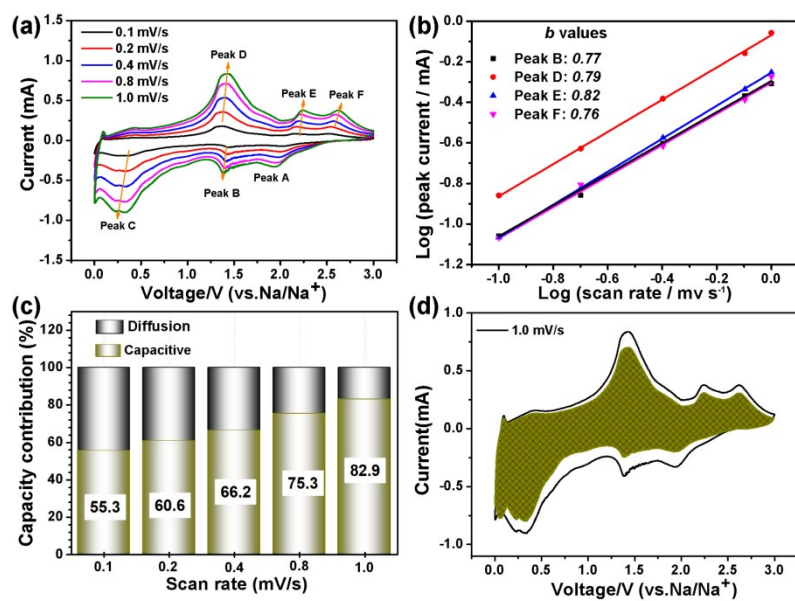

**Fig. S15.** (a) CV curves at various scan rates from 0.1 to 1.0 mV s<sup>-1</sup>, (b) the plots of log(i) vs. log(v), (c) the ratios of capacitive contribution at various rates, (d) CV curves with capacitive contribution at 1.0 mV s<sup>-1</sup> of FeS<sub>2</sub>/C.



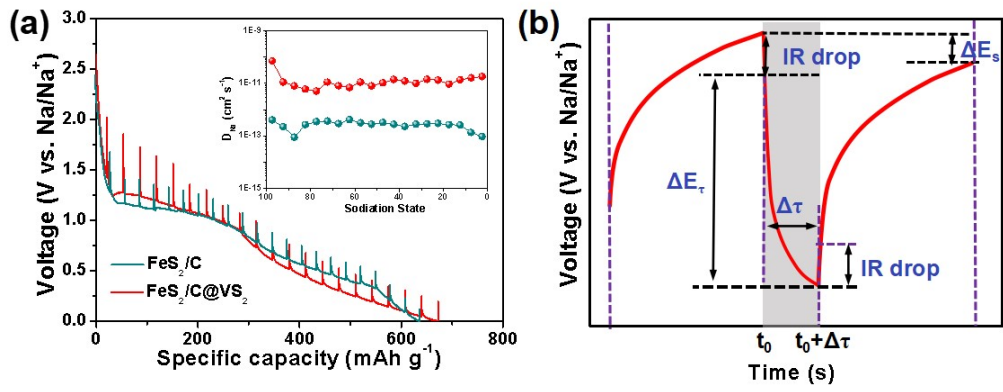

**Fig. S16.** (a) Discharge curves of the GITT test for  $\text{FeS}_2/\text{C}$  and  $\text{FeS}_2/\text{C}@\text{VS}_2$  electrodes and comparison of the corresponding  $\text{Na}^+$  diffusion coefficient. (b) The detailed voltage response during a single current pulse.

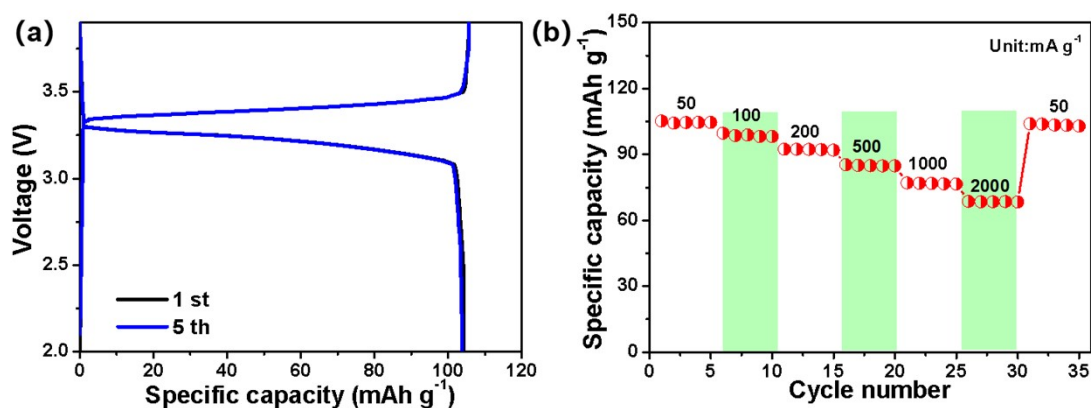

**Fig. S17.** The electrochemical performance of NVP/C cathodes. (a) Galvanostatic charge-discharge curves, (b) rate capacity.

The NVP/C cathodes were tested with a voltage window of 2.0-3.9 V under 0.05 A g<sup>-1</sup>, it displayed a discharge capacity of 104.3 mA h g<sup>-1</sup> in the first loop. With the elevating current density from 0.05 to 2.0 A g<sup>-1</sup>, it showed excellent rate behaviors with average discharge capacities of 104.7, 98.7, 92.3, 85.0, 75.8 and 68.5 mA h g<sup>-1</sup>, respectively.

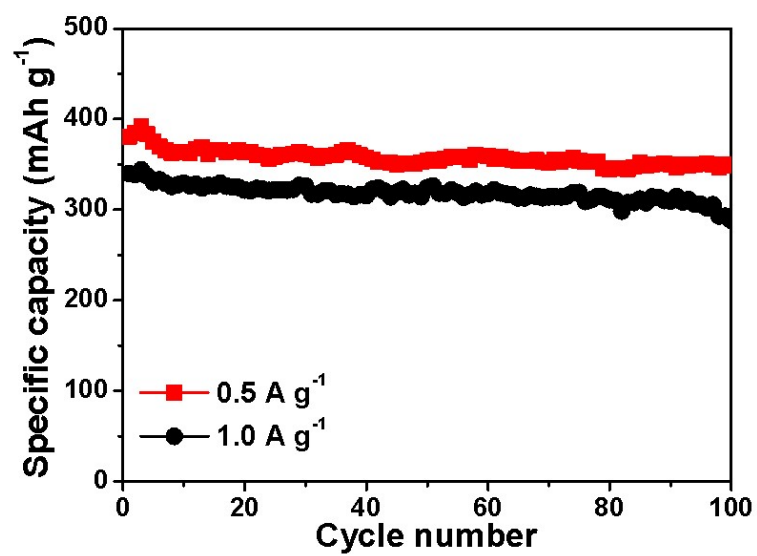

Fig. S18. The cycling performance at 0.5 and 1.0 A g<sup>-1</sup> of the full cells.

**Table S1.** Composition content (wt%) of FeS<sub>2</sub>/C@VS<sub>2</sub> sample obtained by ICP-MS.

|                   | FeS <sub>2</sub> | VS <sub>2</sub> | C    |
|-------------------|------------------|-----------------|------|
| <b>Content(%)</b> | 73.2             | 15.2            | 11.6 |

**Table S2.** The kinetic parameters of FeS<sub>2</sub>/C and FeS<sub>2</sub>/C@VS<sub>2</sub> samples after 100 cycles.

| Materials                           | Cycle | R <sub>s</sub> | R <sub>f</sub> | R <sub>ct</sub> |
|-------------------------------------|-------|----------------|----------------|-----------------|
| FeS <sub>2</sub> /C                 | 0     | 5.53           | -              | 300.95          |
|                                     | 100   | 7.62           | 11.63          | 589.67          |
| FeS <sub>2</sub> /C@VS <sub>2</sub> | 0     | 4.71           | -              | 198.69          |
|                                     | 100   | 5.76           | 8.69           | 320.26          |

**Table S3.** A comprehensive comparison with the recent references involving various Fe-based electrodes for SIBs.

| Materials                                        | Current rate (A g <sup>-1</sup> ) | Capacity (mAh g <sup>-1</sup> ) | High current rate (A g <sup>-1</sup> ) | Capacity (mAh g <sup>-1</sup> ) | Ref.             |
|--------------------------------------------------|-----------------------------------|---------------------------------|----------------------------------------|---------------------------------|------------------|
| FeS <sub>2</sub> /MoS <sub>2</sub> -rGO          | 0.1                               | 460                             | 2                                      | 380                             | 4                |
| Core-shell FeS@carbon                            | 0.1                               | 498                             | 2                                      | 295                             | 5                |
| FeS <sub>2</sub> @C nanoboxes                    | 0.1                               | 560                             | 2                                      | 470                             | 6                |
| FeS <sub>2</sub> /C nanospheres                  | 0.1                               | 400                             | -                                      | -                               | 7                |
| FeS@C-N microspheres                             | 0.1                               | 656                             | 0.8                                    | 365                             | 8                |
| FeS <sub>2</sub> @C nanorods                     | 0.1                               | 365                             | 2                                      | 235                             | 9                |
| FeS <sub>2</sub> @FeSe <sub>2</sub> microspheres | 0.1                               | 596                             | 2                                      | 426                             | 10               |
| FeS <sub>2-x</sub> Se <sub>x</sub>               | 0.1                               | 370                             | 2                                      | 264                             | 11               |
| FeS <sub>2</sub> @G@CNF                          | 0.1                               | 436                             | 2                                      | 312                             | 12               |
| <b>FeS<sub>2</sub>/C@VS<sub>2</sub></b>          | <b>0.1</b>                        | <b>542</b>                      | <b>2</b>                               | <b>453</b>                      | <b>This work</b> |

## References:

1. W. Ma, P. He, T. Wang, J. Xu, X. Liu, Q. Zhuang, Z.-K. Cui and S. Lin, Microwave absorption of carbonization temperature-dependent uniform yolk-shell H-Fe<sub>3</sub>O<sub>4</sub>@C microspheres, *Chem. Eng. J.*, 2021, **420**, 129875.
2. Z. Feng, G. Li, X. Wang, C. J. Gómez-García, J. Xin, H. Ma, H. Pang and K. Gao, FeS<sub>2</sub>/MoS<sub>2</sub>@RGO hybrid materials derived from polyoxomolybdate-based metal-organic frameworks as high-performance electrocatalyst for ammonia synthesis under ambient conditions, *Chem. Eng. J.*, 2022, **445**, 136797.
3. L. Cao, X. Gao, B. Zhang, X. Ou, J. Zhang and W.-B. Luo, Bimetallic Sulfide Sb<sub>2</sub>S<sub>3</sub>@FeS<sub>2</sub> Hollow Nanorods as High-Performance Anode Materials for Sodium-Ion Batteries, *ACS Nano*, 2020, **14**, 3610-3620.
4. S. Yuvaraj, G. K. Veerasubramani, M.-S. Park, P. Thangavel and D.-W. Kim, Facile synthesis of FeS<sub>2</sub>/MoS<sub>2</sub> composite intertwined on rGO nanosheets as a high-performance anode material for sodium-ion battery, *J. Alloys Compd.*, 2020, **821**, 153222.
5. F. Bu, P. Xiao, J. Chen, M. F. Aly Aboud, I. Shakir and Y. Xu, Rational design of three-dimensional graphene encapsulated core-shell FeS@carbon nanocomposite as a flexible high-performance anode for sodium-ion batteries, *J. Mater. Chem. A.*, 2018, **6**, 6414-6421.
6. Z. Liu, T. Lu, T. Song, X.-Y. Yu, X. W. Lou and U. Paik, Structure-designed synthesis of FeS<sub>2</sub>@C yolk-shell nanoboxes as a high-performance anode for sodium-ion batteries, *Energy Environ. Sci.*, 2017, **10**, 1576-1580.
7. Y. Zhu, L. Suo, T. Gao, X. Fan, F. Han and C. Wang, Ether-based electrolyte enabled Na/FeS<sub>2</sub> rechargeable batteries, *Electrochem. Commun.*, 2015, **54**, 18-22.
8. Z.-G. Wu, J.-T. Li, Y.-J. Zhong, J. Liu, K. Wang, X.-D. Guo, L. Huang, B.-H. Zhong and S.-G. Sun, Synthesis of FeS@C-N hierarchical porous microspheres for the applications in lithium/sodium ion batteries, *J. Alloys Compd.*, 2016, **688**, 790-797.
9. Z. Lu, N. Wang, Y. Zhang, P. Xue, M. Guo, B. Tang, Z. Bai and S. Dou, Pyrite FeS<sub>2</sub>@C nanorods as smart cathode for sodium ion battery with ultra-long lifespan and notable rate performance from tunable pseudocapacitance, *Electrochim. Acta.*, 2018, **260**, 755-761.
10. W. Zhao, C. Guo and C. M. Li, Lychee-like FeS<sub>2</sub>@FeSe<sub>2</sub> core-shell microspheres anode in sodium ion batteries for large capacity and ultralong cycle life, *J. Mater. Chem. A.*, 2017, **5**, 19195-19202.
11. Y. Long, J. Yang, X. Gao, X. Xu, W. Fan, J. Yang, S. Hou and Y. Qian, Solid-Solution Anion-Enhanced Electrochemical Performances of Metal Sulfides/Selenides for Sodium-Ion Capacitors: The Case of FeS<sub>2-x</sub>Se<sub>x</sub>, *ACS Appl. Mater. Inter.*, 2018, **10**, 10945-10954.
12. C. Chen, Y. Yang, X. Tang, R. Qiu, S. Wang, G. Cao and M. Zhang, Graphene-Encapsulated FeS<sub>2</sub> in Carbon Fibers as High Reversible Anodes for Na<sup>+</sup>/K<sup>+</sup> Batteries in a Wide Temperature Range, *Small*, 2019, **15**, 1804740.
